# Supplementary material for: Enhanced Control of Oncolytic Measles Virus Using MicroRNA Target Sites
Source: PubMed Central journal article supplement — Mol Ther Oncolytics. 2018 Apr 12;9:30–40. doi: 10.1016/j.omto.2018.04.002 (PMC6026446; doi:10.1016/j.omto.2018.04.002), 2018-04-12
Supplement: mmc1.pdf [file mmc1.pdf]

**OMTO, Volume 9**

## **Supplemental Information**

### **Enhanced Control of Oncolytic Measles**

#### **Virus Using MicroRNA Target Sites**

**Mathias Felix Leber, Marc-Andrea Baertsch, Sophie Caroline Anker, Luisa Henkel, Hans Martin Singh, Sascha Bossow, Christine E. Engeland, Russell Barkley, Birgit Hoyler, Jessica Albert, Christoph Springfeld, Dirk Jäger, Christof von Kalle, and Guy Ungerechts**

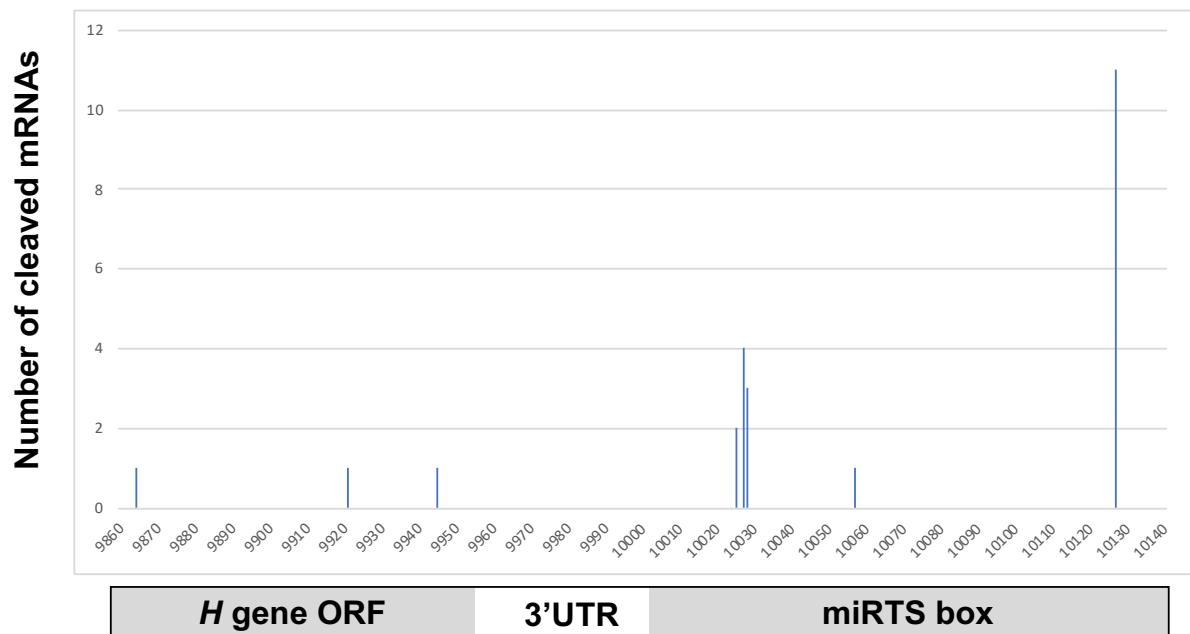

**Figure S1: Distribution of cleavage sites within the sequenced MV-H<sup>miRTS7</sup> mRNAs harboring a miRTS box for miR-7-5p.** Fig. S1 displays the distribution and frequency of individual cleavage sites in presence of miR-7-5p detected by the RACE experiment (**Fig. 7**). Numbers on the x-axis indicate the position within the MV genome. Events at position 10127 represent uncleaved full-length MV-H<sup>miRTS7</sup> mRNAs.
